# Supplementary material
Source: Springer Nature journal article supplement (https://www.springermedizin.de/resource/supplementary/12885_2013_4131_MOESM1_ESM.pdf/9465366)
Supplement: MOESM1 [file 9465366]

Potentially eligible patients'  
diagnosis with advanced Lung  
cancer

Inclusion and study registration  
Baseline assessment

Randomization  
Stratified by sex, lung cancer type

Arm 1

12 weeks physical and psycho-  
social intervention

Arm 2

Usual care

Follow-up  
12 weeks and 12 months  
PRO, physical fitness & function
